# Supplementary material for: Mindfulness, Construction of Meaning, and Sustainable Food Consumption
Source: Springer Nature journal article supplement (doi:10.1007/s12671-018-0986-0), 2018-06-22
Supplement: MOESM1 [file 15866348]

**Supplementary Materials**

List of all items of all final scales

| Scale | Item code | Item |  |
| --- | --- | --- | --- |
| Observing |  |  |  |
|  | OBS15 | I pay attention to sensations, such as the wind in my hair or sun on my face. |  |
|  | OBS26 | I notice the smells and aromas of things. |  |
|  | OBS31 | I notice visual elements in art or nature, such as colors, shapes, textures, or patterns of light and shadow. |  |
| Describing |  |  |  |
|  | DES02 | I’m good at finding words to describe my feelings. |  |
|  | DES12 | It’s hard for me to find the words to describe what I’m thinking. | (r) |
|  | DES16 | I have trouble thinking of the right words to express how I feel about things. | (r) |
|  | DES37 | I can usually describe how I feel at the moment in considerable detail. |  |
| Acting with awareness |  |  |  |
|  | ACT05 | When I do things, my mind wanders off and I’m easily distracted. | (r) |
|  | ACT08 | I don’t pay attention to what I’m doing because I’m daydreaming, worrying, or otherwise distracted. | (r) |
|  | ACT13 | I am easily distracted. | (r) |
|  | ACT18 | I find it difficult to stay focused on what’s happening in the present. | (r) |
| Non-judging |  |  |  |
|  | NJ10 | I tell myself I shouldn’t be feeling the way I’m feeling. | (r) |
|  | NJ14 | I believe some of my thoughts are abnormal or bad and I shouldn’t think that way. |  |
|  | NJ17 | I make judgments about whether my thoughts are good or bad. | (r) |
|  | NJ25 | I tell myself that I shouldn’t be thinking the way I’m thinking. | (r) |
|  | NJ30 | I think some of my emotions are bad or inappropriate and I shouldn’t feel them. | (r) |
| Nonreactivity | NR19 | When I have distressing thoughts or images, I “step back” and am aware of the thought or image without getting taken over by it. |  |
|  | NR24 | When I have distressing thoughts or images, I feel calm soon after. |  |
|  | NR29 | When I have distressing thoughts or images I am able just to notice them  without reacting. |  |
|  | NR33 | When I have distressing thoughts or images, I just notice them and let them go. |  |
| Construction of meaning (CoM) |  |  |  |
|  | M01 | I actively contemplate questions on meaning in my life. |  |
|  | M02 | I seldom engage in question about meaning. | (r) |
|  | M05 | To engage myself with questions about meaning is an essential part of my life. |  |
|  | M07 | It is important for me to find meaning in my life. |  |
| Sustainability-related meaning (SusM) |  |  |  |
|  | MS03 | The idea of sustainability is an essential part of my meaning in life. |  |
|  | MS04 | My life is meaningful, when I can contribute to the benefit of future generations. |  |
|  | MS06 | Environmental protection is not an essential part of my meaning in life. | (r) |
|  | MS08 | It is part of my meaning in life to safeguard the environment for future generations. |  |
| Personal Norm SF (PNorm) |  |  |  |
|  | PNormOR01 | I feel personally obligated to buy as often as I can organic grown food products instead of conventional grown. |  |
|  | PNormLO02 | My personal values obligate me to buy locally grown food products instead of imported products. |  |
| Sustainable food consumption (SF) |  |  |  |
|  | SFORG01 | While shopping, I prefer organic grown food, instead of conventional grown food. |  |
|  | SFLOC02 | I buy locally grown food. |  |
|  |  |  |  |
|  |  |  |  |
| Vegetarian food consumption (VF) |  |  |  |
|  | VVH01 | I mostly avoid buying meat products. |  |
|  | VVH02 | I mostly avoid buying food, which contains animal products. |  |
|  | VVH03 | Vegetarian diet: yes/no (Categorial) |  |
| Personal Norm VF (single Item) |  |  |  |
|  | PNormV01 | Because of my personal values, I feel obligated to reduce my consumption of animal products. |  |

*Note.* The mindfulness items are taken from the FFMQ (Baer et al., 2008; German version: Michalak et al., 2016). The numeration is equal to the original Questionnaire. All other items are directly translated from German. Recoded Items are marked in the last column.

Model estimates for the structural equation model 1

|  | B | SE | β | p |
| --- | --- | --- | --- | --- |
| Observing 🡪 OBS31 | - | - | 0.673 | - |
| Observing 🡪 OBS15 | 0.889 | 0.108 | 0.684 | <.001 |
| Observing 🡪 OBS26 | 0.976 | 0.113 | 0.692 | <.001 |
| Describing 🡪 DES12 | - | - | 0.850 | - |
| Describing 🡪 DES02 | .879 | 0.058 | 0.754 | <.001 |
| Describing 🡪 DES16 | 1.111 | 0.057 | 0.915 | <.001 |
| Describing 🡪 DES37 | 0.735 | 0.059 | 0.651 | <.001 |
| Acting with awareness 🡪 ACT13 | - | - | 0.866 | -- |
| Acting with awareness 🡪 ACT05 | 0.879 | 0.056 | 0.806 | <.001 |
| Acting with awareness 🡪 ACT08 | 0.684 | 0.058 | 0.638 | <.001 |
| Acting with awareness 🡪 ACT18 | 0.750 | 0.056 | 0.714 | <.001 |
| Non-judging 🡪 NJ14 | - | - | 0.716 | - |
| Non-judging 🡪 NJ10 | 0.840 | 0.081 | 0.634 | <.001 |
| Non-judging 🡪 NJ17 | 1.005 | 0.090 | 0.688 | <.001 |
| Non-judging 🡪 NJ25 | 1.085 | 0.083 | 0.816 | <.001 |
| Non-judging 🡪 NJ30 | 1.127 | 0.085 | 0.829 | <.001 |
| Nonreactivity 🡪 NR29 | - | - | 0.708 | - |
| Nonreactivity 🡪 NR19 | 1.067 | 0.094 | 0.742 | <.001 |
| Nonreactivity 🡪 NR24 | 1.015 | 0.092 | 0.741 | <.001 |
| Nonreactivity 🡪 NR33 | 1.121 | 0.098 | 0.757 | <.001 |
| CoM 🡪 M01 | - | - | 0.874 | - |
| CoM 🡪 M02 | 0.842 | 0.057 | 0.741 | <.001 |
| CoM 🡪 M05 | 1.100 | 0.062 | 0.847 | <.001 |
| CoM 🡪 M07 | 0.723 | 0.061 | 0.627 | <.001 |
| SusM 🡪 MS03 | - | - | 0.787 | - |
| SusM 🡪 MS04 | 0.745 | 0.072 | 0.629 | <.001 |
| SusM 🡪 MS06 | 0.600 | 0.088 | 0.421 | <.001 |
| SusM 🡪 MS08 | 0.928 | 0.076 | 0.757 | <.001 |
| PNorm 🡪 PNormLO2 | - | - | 0.597 | - |
| PNorm 🡪 PNormOR01 | 1.558 | 0.153 | 0.836 | <.001 |
| SF 🡪 SFORG01 | - | - | 0.864 | - |
| SF 🡪 SFLOC02 | 0.625 | 0.055 | 0.687 | <.001 |
| Observing 🡪 CoM | 0.636 | 0.115 | 0.449 | <.001 |
| Describing 🡪 CoM | 0.225 | 0.079 | 0.211 | .004 |
| Non-judging 🡪 CoM | -0.234 | 0.081 | -0.203 | .004 |
| Achting with awareness 🡪 CoM | -0.061 | 0.069 | -0.064 | .374 |
| CoM 🡪 SusM | 0.521 | 0.061 | 0.566 | <.001 |
| SusM 🡪 PNorm | 0.543 | 0.069 | 0.694 | <.001 |
| Non-judging 🡪 PNorm | 0.056 | 0.057 | 0.068 | .324 |
| Nonreactivity 🡪 PNorm | -0.068 | 0.068 | -0.071 | .313 |
| PNorm 🡪 SF | 1.259 | 0.128 | 0.913 | <.001 |
| Observing 🡪 SF | 0.037 | 0.088 | 0.027 | .672 |
| Non-judging 🡪 SF | -0.52 | 0.068 | -0.045 | .839 |
| Acting with awareness 🡪 SF | 0.109 | 0.053 | 0.114 | .040 |
| Nonreactiviy 🡪 SF | 0.018 | 0.089 | 0.014 | .839 |

*Note*. CoM = construction of meaning, SusM = sustainability-related meaning, PNorm = personal norm, SF = sustainable food consumption, Constructs with numbers represent indicator items

Model estimates for the structural equation model 2

|  | B | SE | β | p |
| --- | --- | --- | --- | --- |
| Observing 🡪 OBS31 | - | - | 0.674 | - |
| Observing 🡪 OBS15 | 0.888 | 0.107 | 0.635 | <.001 |
| Observing 🡪 OBS26 | 0.967 | 0.113 | 0.687 | <.001 |
| Describing 🡪 DES12 | - | - | 0.850 | - |
| Describing 🡪 DES02 | .879 | 0.058 | 0.753 | <.001 |
| Describing 🡪 DES16 | 1.111 | 0.057 | 0.915 | <.001 |
| Describing 🡪 DES37 | 0.738 | 0.059 | 0.651 | <.001 |
| Acting with awareness 🡪 ACT13 | - | - | 0.862 | - |
| Acting with awareness 🡪 ACT05 | 0.880 | 0.057 | 0.804 | <.001 |
| Acting with awareness 🡪 ACT08 | 0.691 | 0.059 | 0.641 | <.001 |
| Acting with awareness 🡪 ACT18 | 0.760 | 0.056 | 0.720 | <.001 |
| Non-judging 🡪 NJ14 | - | - | 0.715 | - |
| Non-judging 🡪 NJ10 | 0.842 | 0.081 | 0.635 | <.001 |
| Non-judging 🡪 NJ17 | 1.007 | 0.090 | 0.689 | <.001 |
| Non-judging 🡪 NJ25 | 1.085 | 0.083 | 0.816 | <.001 |
| Non-judging 🡪 NJ30 | 1.128 | 0.085 | 0.829 | <.001 |
| Nonreactivity 🡪 NR29 | - | - | 0.708 | - |
| Nonreactivity 🡪 NR19 | 1.062 | 0.094 | 0.738 | <.001 |
| Nonreactivity 🡪 NR24 | 1.013 | 0.092 | 0.740 | <.001 |
| Nonreactivity 🡪 NR33 | 1.127 | 0.098 | 0.761 | <.001 |
| CoM 🡪 M01 | - | - | 0.874 | - |
| CoM 🡪 M02 | 0.841 | 0.057 | 0.740 | <.001 |
| CoM 🡪 M05 | 1.100 | 0.062 | 0.847 | <.001 |
| CoM 🡪 M07 | 0.724 | 0.061 | 0.628 | <.001 |
| SusM 🡪 MS03 | - | - | 0.736 | - |
| SusM 🡪 MS04 | 0.834 | 0.081 | 0.658 | <.001 |
| SusM 🡪 MS06 | 0.623 | 0.096 | 0.409 | <.001 |
| SusM 🡪 MS08 | 1.051 | 0.089 | 0.802 | <.001 |
| VF 🡪 VVH01 | - | - | 0.888 | - |
| VF 🡪 VVH02 | 1.119 | 0.055 | 0.884 | <.001 |
| VF 🡪 VVH03 | 0.226 | 0.019 | 0.689 | <.001 |
| Observing 🡪 CoM | 0.643 | 0.119 | 0.455 | <.001 |
| Describing 🡪 CoM | 0.221 | 0.079 | 0.208 | .005 |
| Non-judging 🡪 CoM | -0.234 | 0.081 | -0.201 | .004 |
| Achting with awareness 🡪 CoM | -0.065 | 0.069 | -0.067 | .346 |
| CoM 🡪 SusM | 0.482 | 0.059 | 0.560 | <.001 |
| SusM 🡪 PNormV01 | 0.971 | 0.118 | 0.524 | <.001 |
| Non-judging 🡪 PNormV01 | 0.094 | 0.113 | 0.043 | .404 |
| Nonreactivity 🡪 PNormV01 | 0.117 | 0.107 | -0.060 | .275 |
| PNormV01 🡪 VF | 0.684 | 0.039 | 0.782 | <.001 |
| Observing 🡪 VF | 0.098 | 0.110 | 0.050 | .373 |
| Non-judging 🡪 VF | 0.068 | 0.082 | 0.043 | .403 |
| Acting with awareness 🡪 VF | -0.052 | 0.068 | -0.038 | .450 |
| Nonreactiviy 🡪 VF | 0.117 | 0.107 | 0.063 | .275 |

*Note*. CoM = construction of meaning, SusM = sustainability-related meaning, PNormV01 = personal norm vegetarian food consumption, VF = vegetarian food consumption, Constructs with numbers represent indicator items.
